# Supplementary material for: Structural and spectroscopic insights into the performance of K3Tb(PO4)2 green phosphor
Source: Royal Society of Chemistry journal article supplement (doi:10.1039/d4dt01816h), 2024-01-01
Supplement: d4dt01816h3.pdf [file d4dt01816h3.pdf]

## Structural and spectroscopic insights into performance of the $K_3Tb(PO_4)_2$ green phosphor

Vitalii Chornii<sup>a,b\*</sup>, Kateryna Terebilenko<sup>a</sup>, Il'ya Gural'skiy<sup>a</sup>, Mykola Slobodyanik<sup>a</sup>, Valeriia Zozulia<sup>a</sup>, Sergiu Shova<sup>c</sup>, Yaroslav Zhydachevskyy<sup>d</sup>, and Serhii Nedilko<sup>a,d</sup>

<sup>a</sup>Taras Shevchenko National University of Kyiv, 64/13, Volodymyrska St., Kyiv 01601, Ukraine, \*email: [vchornii@gmail.com](mailto:vchornii@gmail.com)

<sup>b</sup>National University of Life and Environmental Sciences of Ukraine, 15 Heroiv Oborony st., Kyiv 03014, Ukraine

<sup>c</sup>“Petru Poni” Institute of Macromolecular Chemistry, 41A Aleea Gr. Ghica Voda, 700487 Iasi, Romania

<sup>d</sup>Institute of Physics, Polish Academy of Sciences, 32/46 Aleja Lotników, PL-02-668, Warsaw, Poland

### Details of beamline measurements

For the studies at beamline (with synchrotron radiation) the  $K_3Tb(PO_4)_2$  powder was pressed into copper cuvettes without adding any glue or other chemicals to the samples. The cuvettes were attached to the holder with a drop of silver varnish that located only under cuvette. A photo of part of the sample holder with attached cuvettes filled with  $K_3Tb(PO_4)_2$  powder can be seen in Fig. S1.

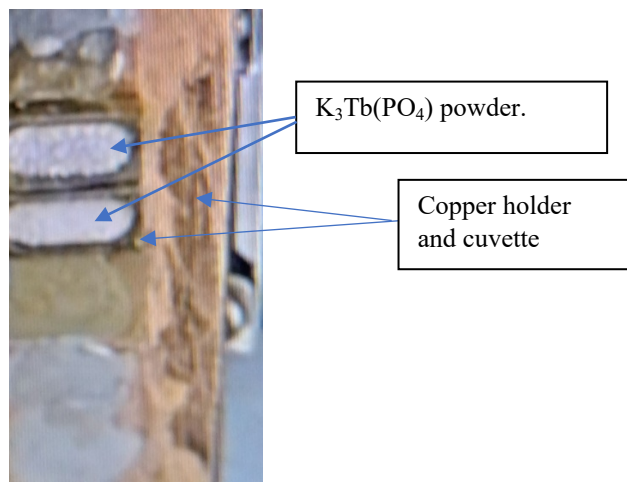

**Fig. S1.** Photo of the sample holder with cuvettes during measurements at SUPERLUMI station.

During the measurements of PL quantum yield on Horiba/Jobin-Yvon Fluorolog-3, the powder was poured into a special ceramic vessel made from non-luminescent material without any additional chemicals. A violet emission band was also observed during these measurements.

## Comparison of the experimental and calculated powder XRD patterns

The phase purity of the bulk is confirmed by powder XRD analysis. Comparison of experimental and simulated patterns is given in Fig. S2. It is seen a good agreement between patterns with a moderate preferential orientation observed.

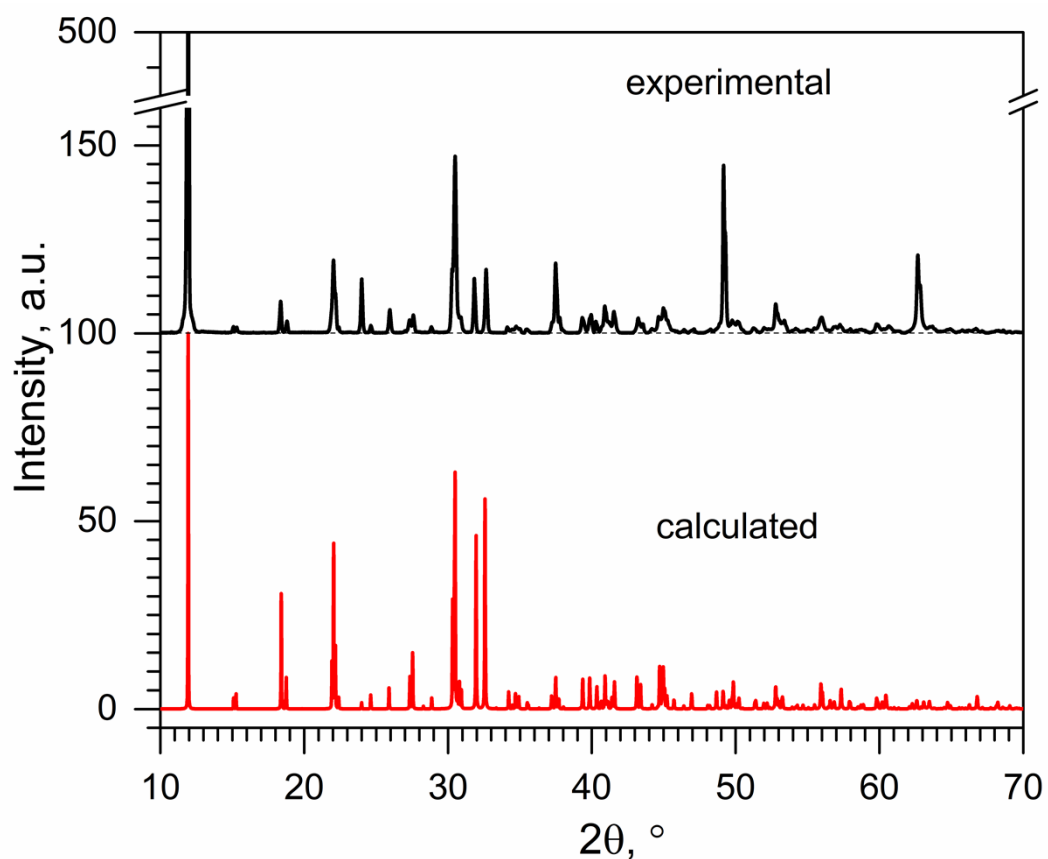

**Fig. S2.** Experimental and calculated powder XRD patterns of  $K_3Tb(PO_4)_2$

## SEM images and EDS analysis

Figure S3 shows the SEM images of the surface and deeper regions (backscattering electron, BSE) of the  $\text{K}_3\text{Tb}(\text{PO}_4)_2$  crystals. Powdered sample consists mainly of grains with sizes about  $0.5\ \mu$  those are tending to agglomeration. Some particles of size near  $5\ \mu$  also can be found from BSE image on Figure S3a. The majority of the particles are relatively large, thus providing very small influence of surface defects on overall optical properties of the samples. The EDS analysis (Figure S3, parts b-e) has shown uniform distribution of K, Tb, P and O over the surface confirming a single-phase character of the sample. No traces of tungsten or any other impurity have been found from the EDS data.

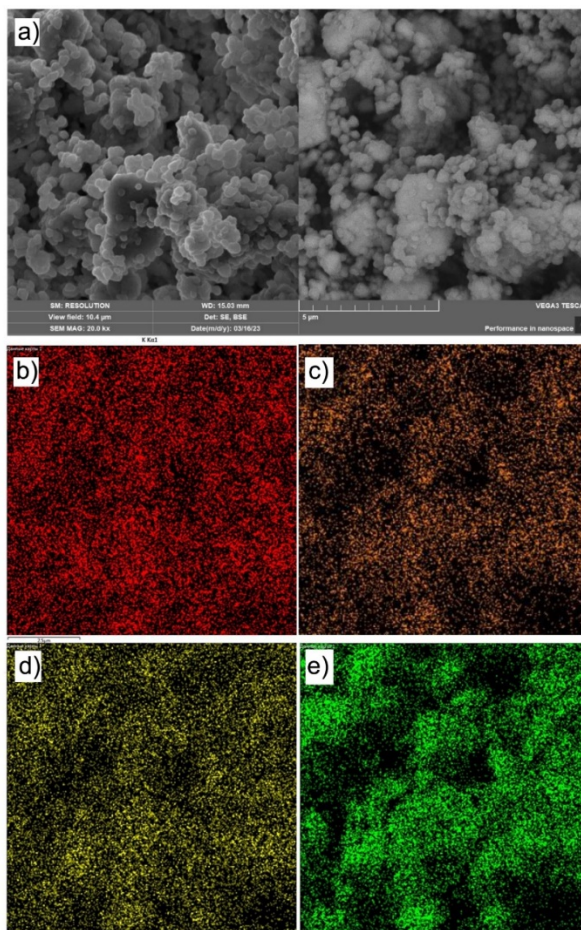

**Fig. S3.** SEM image of a  $\text{K}_3\text{Tb}(\text{PO}_4)_2$  sample where EDS performed (a) and EDS mapping for K (b), Tb (c), P (d), and O (e).

### Detailed view of diffuse reflectance spectrum

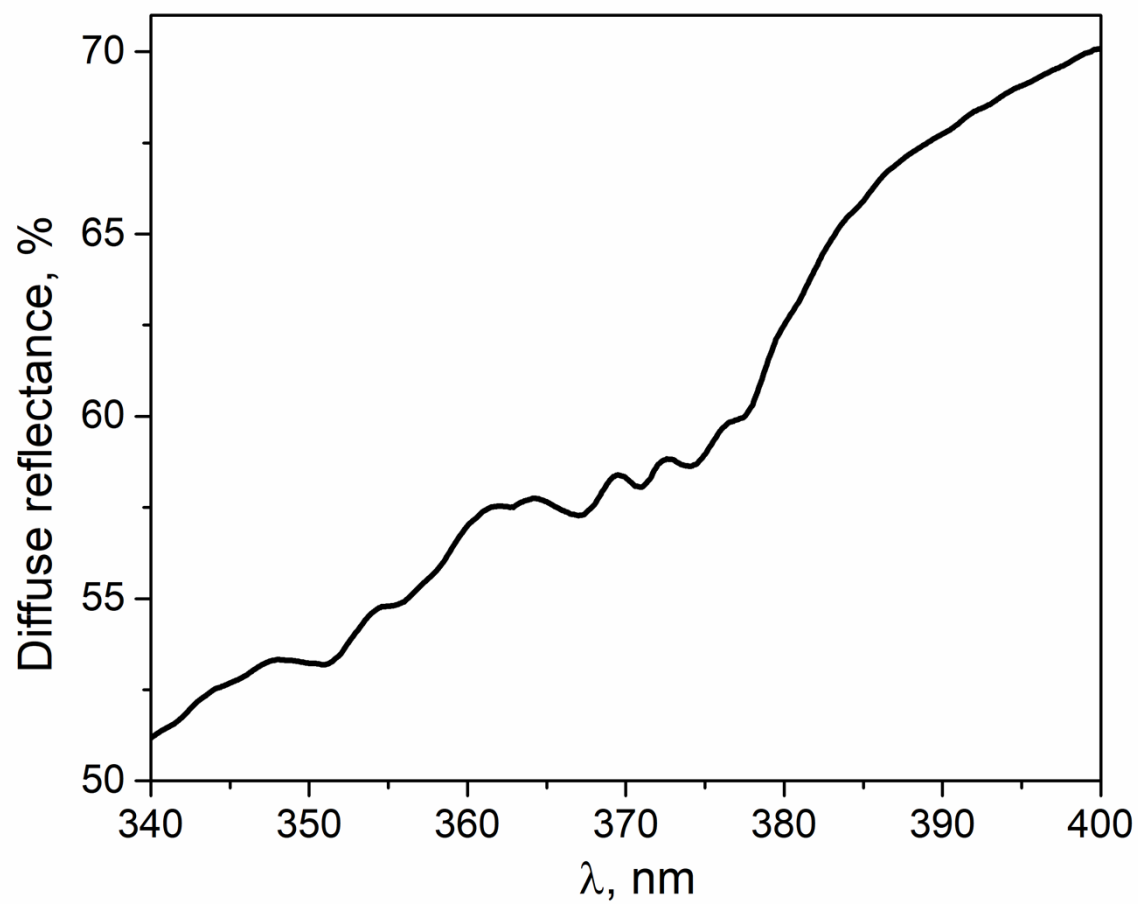

**Fig. S4** Detailed view of diffuse reflectance spectrum of  $K_3Tb(PO_4)_2$  at the region of slope

## Photoluminescence quantum yield

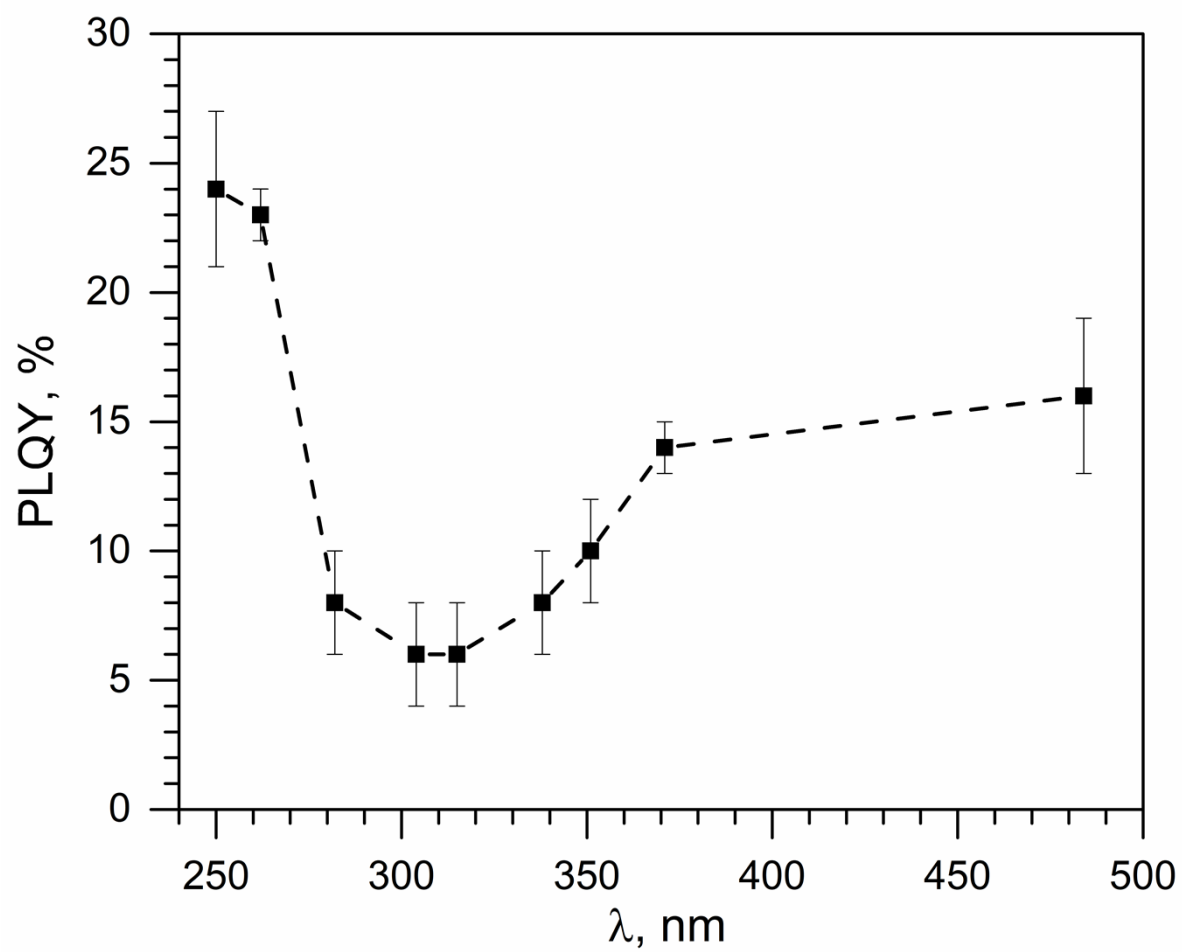

**Fig. S5** Dependency of photoluminescence quantum yield of  $\text{K}_3\text{Tb}(\text{PO}_4)_2$  on excitation wavelength. Dashed line is just guide for eyes. Vertical bars depict the standard deviations.

**Table S1.** Crystal data and structure refinement for  $\text{K}_3\text{Tb}(\text{PO}_4)_2$ 

|                                               |                                                          |
|-----------------------------------------------|----------------------------------------------------------|
| Empirical formula                             | $\text{K}_3\text{O}_8\text{P}_2\text{Tb}$                |
| Formula weight                                | 466.16                                                   |
| Temperature/K                                 | 293(2)                                                   |
| Crystal system                                | monoclinic                                               |
| Space group                                   | $\text{P}2_1/\text{m}$                                   |
| $a/\text{\AA}$                                | 7.4128(18)                                               |
| $b/\text{\AA}$                                | 5.5975(16)                                               |
| $c/\text{\AA}$                                | 9.458(5)                                                 |
| $\alpha/^\circ$                               | 90                                                       |
| $\beta/^\circ$                                | 90.65(3)                                                 |
| $\gamma/^\circ$                               | 90                                                       |
| Volume/ $\text{\AA}^3$                        | 392.4(2)                                                 |
| Z                                             | 2                                                        |
| $\rho_{\text{calc}}/\text{g}/\text{cm}^3$     | 3.945                                                    |
| $\mu/\text{mm}^{-1}$                          | 11.024                                                   |
| F(000)                                        | 432.0                                                    |
| Crystal size/ $\text{mm}^3$                   | $0.126 \times 0.069 \times 0.023$                        |
| Radiation                                     | $\text{MoK}\alpha$ ( $\lambda = 0.71073$ )               |
| $2\Theta$ range for data collection/ $^\circ$ | 4.306 to 58.518                                          |
| Index ranges                                  | $-9 \leq h \leq 9, -6 \leq k \leq 7, -11 \leq l \leq 12$ |
| Reflections collected                         | 1879                                                     |
| Independent reflections                       | 1879 [ $R_{\text{sigma}} = 0.0670$ ]                     |
| Data/restraints/parameters                    | 1879/6/80                                                |
| Goodness-of-fit on $F^2$                      | 1.020                                                    |
| Final R indexes [ $I \geq 2\sigma(I)$ ]       | $R_1 = 0.0499, wR_2 = 0.1100$                            |
| Final R indexes [all data]                    | $R_1 = 0.0604, wR_2 = 0.1128$                            |
| Largest diff. peak/hole / $e \text{\AA}^{-3}$ | 5.65/-2.46                                               |

Further details of the crystal structure investigations may be obtained from the Fachinformationszentrum Karlsruhe, 76344 Eggenstein-Leopoldshafen, Germany (Fax: +49-7247-808-666; E-Mail: [crysdata@fizkarlsruhe.de](mailto:crysdata@fizkarlsruhe.de), [http://www.fiz-karlsruhe.de/request\\_for\\_deposited\\_data.html](http://www.fiz-karlsruhe.de/request_for_deposited_data.html)) on quoting the depository numbers CSD- 2373835.

**Table S2.** Fractional Atomic Coordinates ( $\times 10^4$ ) and Equivalent Isotropic Displacement Parameters ( $\text{\AA}^2 \times 10^3$ ) for  $\text{K}_3\text{Tb}(\text{PO}_4)_2$

| Atom | <i>x</i>  | <i>y</i> | <i>z</i>  | U(eq)    |
|------|-----------|----------|-----------|----------|
| Tb1  | -69.0(10) | 2500     | 2114.0(9) | 10.8(2)  |
| K2   | 7951(4)   | 7500     | 4188(4)   | 14.4(7)  |
| K1   | 3643(4)   | -2500    | 897(4)    | 16.9(7)  |
| K3   | 5037(5)   | 7500     | 6929(4)   | 16.9(7)  |
| P1   | -1900(5)  | -2500    | 735(4)    | 8.0(8)   |
| P2   | 2288(5)   | 7500     | 4114(5)   | 7.4(7)   |
| O4   | 1514(11)  | 5256(13) | 3366(8)   | 14.5(17) |
| O1   | -2410(11) | -264(13) | 1571(8)   | 14.5(17) |
| O6   | 1724(16)  | 7500     | 5676(11)  | 13(2)    |
| O3   | -2818(14) | -2500    | -730(11)  | 14(2)    |
| O2   | 145(14)   | -2500    | 426(12)   | 16(2)    |
| O5   | 4337(13)  | 7500     | 3980(12)  | 15(2)    |

**Table S3.** Anisotropic Displacement Parameters ( $\text{\AA}^2 \times 10^3$ ) for  $\text{K}_3\text{Tb}(\text{PO}_4)_2$ . The Anisotropic displacement factor exponent takes the form:  $-2\pi^2[h^2a^2U_{11}+2hka^*b^*U_{12}+\dots]$ .

| Atom | $U_{11}$ | $U_{22}$ | $U_{33}$ | $U_{23}$ | $U_{13}$ | $U_{12}$ |
|------|----------|----------|----------|----------|----------|----------|
| Tb1  | 6.7(4)   | 11.7(4)  | 14.0(4)  | 0        | 0.5(2)   | 0        |
| K2   | 15.2(17) | 17.4(16) | 10.6(16) | 0        | 1.3(13)  | 0        |
| K1   | 13.2(17) | 20.7(17) | 16.9(18) | 0        | 1.1(14)  | 0        |
| K3   | 13.5(16) | 23.4(17) | 13.7(19) | 0        | -2.6(13) | 0        |
| P1   | 7.3(18)  | 11.4(18) | 5.3(19)  | 0        | -1.1(15) | 0        |
| P2   | 7.5(18)  | 8.3(17)  | 6.4(18)  | 0        | -0.3(14) | 0        |
| O4   | 20(4)    | 11(4)    | 12(4)    | -3(3)    | 2(3)     | -4(3)    |
| O1   | 23(5)    | 11(4)    | 9(4)     | -3(3)    | -1(3)    | -1(3)    |
| O6   | 22(6)    | 7(5)     | 11(6)    | 0        | -1(5)    | 0        |
| O3   | 10(6)    | 22(6)    | 9(6)     | 0        | 0(4)     | 0        |
| O2   | 13(6)    | 18(5)    | 18(6)    | 0        | 4(5)     | 0        |
| O5   | 6(4)     | 21(4)    | 18(5)    | 0        | 2(4)     | 0        |



**Table S4.** Bond Lengths for  $K_3Tb(PO_4)_2$ .

| Atom | Atom             | Length/Å   |  | Atom | Atom             | Length/Å  |
|------|------------------|------------|--|------|------------------|-----------|
| Tb1  | K2 <sup>1</sup>  | 3.728(2)   |  | K1   | O1 <sup>15</sup> | 2.938(8)  |
| Tb1  | K2 <sup>2</sup>  | 3.817(4)   |  | K1   | O1 <sup>5</sup>  | 2.938(8)  |
| Tb1  | K2 <sup>3</sup>  | 3.728(2)   |  | K1   | O1 <sup>7</sup>  | 3.239(8)  |
| Tb1  | K3 <sup>4</sup>  | 3.802(4)   |  | K1   | O3 <sup>16</sup> | 2.869(3)  |
| Tb1  | P1 <sup>5</sup>  | 3.079(4)   |  | K1   | O3 <sup>7</sup>  | 3.057(11) |
| Tb1  | O4 <sup>6</sup>  | 2.264(7)   |  | K1   | O3 <sup>5</sup>  | 2.869(3)  |
| Tb1  | O4               | 2.264(7)   |  | K1   | O2               | 2.626(11) |
| Tb1  | O1 <sup>6</sup>  | 2.377(7)   |  | K1   | O5 <sup>13</sup> | 2.955(12) |
| Tb1  | O1               | 2.377(8)   |  | K3   | P2 <sup>2</sup>  | 3.575(3)  |
| Tb1  | O6 <sup>4</sup>  | 2.436(11)  |  | K3   | P2 <sup>8</sup>  | 3.575(3)  |
| Tb1  | O3 <sup>5</sup>  | 2.521(11)  |  | K3   | O4 <sup>2</sup>  | 3.002(8)  |
| Tb1  | O2 <sup>5</sup>  | 2.402(11)  |  | K3   | O4 <sup>9</sup>  | 3.002(8)  |
| K2   | P2 <sup>7</sup>  | 3.216(5)   |  | K3   | O1 <sup>4</sup>  | 2.874(8)  |
| K2   | P2 <sup>8</sup>  | 3.233(3)   |  | K3   | O1 <sup>17</sup> | 2.874(8)  |
| K2   | O4 <sup>9</sup>  | 2.805(8)   |  | K3   | O6               | 2.715(12) |
| K2   | O4 <sup>2</sup>  | 2.805(8)   |  | K3   | O3 <sup>18</sup> | 2.711(11) |
| K2   | O4 <sup>7</sup>  | 3.034(8)   |  | K3   | O5 <sup>2</sup>  | 2.966(4)  |
| K2   | O4 <sup>10</sup> | 3.034(8)   |  | K3   | O5 <sup>8</sup>  | 2.966(4)  |
| K2   | O1 <sup>11</sup> | 2.784(8)   |  | K3   | O5               | 2.831(12) |
| K2   | O1 <sup>12</sup> | 2.784(8)   |  | P1   | O1               | 1.530(8)  |
| K2   | O6 <sup>7</sup>  | 3.116(12)  |  | P1   | O1 <sup>19</sup> | 1.530(8)  |
| K2   | O6 <sup>2</sup>  | 2.8119(14) |  | P1   | O3               | 1.537(11) |
| K2   | O6 <sup>8</sup>  | 2.8119(14) |  | P1   | O2               | 1.547(11) |
| K2   | O5               | 2.684(11)  |  | P2   | P2 <sup>20</sup> | 0.000(11) |
| K1   | P2 <sup>13</sup> | 3.215(6)   |  | P2   | O4 <sup>20</sup> | 1.548(7)  |
| K1   | O4 <sup>6</sup>  | 3.100(9)   |  | P2   | O4               | 1.548(7)  |
| K1   | O4 <sup>13</sup> | 3.100(9)   |  | P2   | O6               | 1.540(11) |
| K1   | O1 <sup>14</sup> | 3.239(8)   |  | P2   | O5               | 1.526(11) |

<sup>1</sup>-1+X,+Y,+Z; <sup>2</sup>1-X,1-Y,1-Z; <sup>3</sup>-1+X,-1+Y,+Z; <sup>4</sup>-X,1-Y,1-Z; <sup>5</sup>-X,-Y,-Z; <sup>6</sup>+X,1/2-Y,+Z; <sup>7</sup>1+X,+Y,+Z; <sup>8</sup>1-X,2-Y,1-Z; <sup>9</sup>1-X,1/2+Y,1-Z; <sup>10</sup>1+X,3/2-Y,+Z; <sup>11</sup>1+X,1/2-Y,+Z; <sup>12</sup>1+X,1+Y,+Z; <sup>13</sup>+X,-1+Y,+Z; <sup>14</sup>1+X,-1/2-Y,+Z; <sup>15</sup>-X,-1/2+Y,-Z; <sup>16</sup>-X,-1-Y,-Z; <sup>17</sup>-X,1/2+Y,1-Z; <sup>18</sup>1+X,1+Y,1+Z; <sup>19</sup>+X,-1/2-Y,+Z; <sup>20</sup>+X,3/2-Y,+Z

**Table S5.** Bond Angles for K<sub>3</sub>Tb(PO<sub>4</sub>)<sub>2</sub>.

| Atom            | Atom | Atom            | Angle/°    | Atom             | Atom | Atom             | Angle/°    |
|-----------------|------|-----------------|------------|------------------|------|------------------|------------|
| K2 <sup>1</sup> | Tb1  | K2 <sup>2</sup> | 97.30(8)   | O6               | K3   | O4 <sup>3</sup>  | 136.6(2)   |
| K2 <sup>1</sup> | Tb1  | K2 <sup>3</sup> | 71.23(7)   | O6               | K3   | O4 <sup>10</sup> | 136.6(2)   |
| K2 <sup>2</sup> | Tb1  | K2 <sup>3</sup> | 71.23(7)   | O6               | K3   | O1 <sup>17</sup> | 66.5(3)    |
| K2 <sup>2</sup> | Tb1  | K3 <sup>4</sup> | 59.11(5)   | O6               | K3   | O1 <sup>4</sup>  | 66.5(3)    |
| K2 <sup>1</sup> | Tb1  | K3 <sup>4</sup> | 59.11(5)   | O6               | K3   | O5               | 54.2(3)    |
| K3 <sup>4</sup> | Tb1  | K2 <sup>3</sup> | 99.86(8)   | O6               | K3   | O5 <sup>8</sup>  | 91.0(2)    |
| P1 <sup>5</sup> | Tb1  | K2 <sup>2</sup> | 130.83(4)  | O6               | K3   | O5 <sup>3</sup>  | 91.0(2)    |
| P1 <sup>5</sup> | Tb1  | K2 <sup>1</sup> | 130.83(4)  | O3 <sup>18</sup> | K3   | K2               | 104.6(3)   |
| P1 <sup>5</sup> | Tb1  | K2 <sup>3</sup> | 127.42(9)  | O3 <sup>18</sup> | K3   | P2 <sup>8</sup>  | 84.44(17)  |
| P1 <sup>5</sup> | Tb1  | K3 <sup>4</sup> | 132.72(10) | O3 <sup>18</sup> | K3   | P2 <sup>3</sup>  | 84.44(17)  |
| O4              | Tb1  | K2 <sup>3</sup> | 46.8(2)    | O3 <sup>18</sup> | K3   | O4 <sup>3</sup>  | 65.4(3)    |
| O4 <sup>6</sup> | Tb1  | K2 <sup>1</sup> | 116.2(2)   | O3 <sup>18</sup> | K3   | O4 <sup>10</sup> | 65.4(3)    |
| O4              | Tb1  | K2 <sup>2</sup> | 116.2(2)   | O3 <sup>18</sup> | K3   | O1 <sup>17</sup> | 89.5(3)    |
| O4              | Tb1  | K2 <sup>1</sup> | 54.4(2)    | O3 <sup>18</sup> | K3   | O1 <sup>4</sup>  | 89.5(3)    |
| O4 <sup>6</sup> | Tb1  | K2 <sup>3</sup> | 46.8(2)    | O3 <sup>18</sup> | K3   | O6               | 151.1(4)   |
| O4 <sup>6</sup> | Tb1  | K2 <sup>2</sup> | 54.4(2)    | O3 <sup>18</sup> | K3   | O5 <sup>8</sup>  | 98.3(2)    |
| O4 <sup>6</sup> | Tb1  | K3 <sup>4</sup> | 111.9(2)   | O3 <sup>18</sup> | K3   | O5 <sup>3</sup>  | 98.3(2)    |
| O4              | Tb1  | K3 <sup>4</sup> | 111.9(2)   | O3 <sup>18</sup> | K3   | O5               | 154.6(3)   |
| O4 <sup>6</sup> | Tb1  | P1 <sup>5</sup> | 102.1(2)   | O5 <sup>8</sup>  | K3   | K2               | 71.1(2)    |
| O4              | Tb1  | P1 <sup>5</sup> | 102.1(2)   | O5 <sup>3</sup>  | K3   | K2               | 71.1(2)    |
| O4 <sup>6</sup> | Tb1  | O4              | 85.9(4)    | O5               | K3   | K2               | 50.1(2)    |
| O4              | Tb1  | O1 <sup>6</sup> | 92.4(3)    | O5 <sup>8</sup>  | K3   | P2 <sup>3</sup>  | 124.7(2)   |
| O4 <sup>6</sup> | Tb1  | O1 <sup>6</sup> | 158.3(3)   | O5 <sup>3</sup>  | K3   | P2 <sup>8</sup>  | 124.7(2)   |
| O4 <sup>6</sup> | Tb1  | O1              | 92.4(3)    | O5 <sup>3</sup>  | K3   | P2 <sup>3</sup>  | 24.81(19)  |
| O4              | Tb1  | O1              | 158.3(3)   | O5               | K3   | P2 <sup>8</sup>  | 79.88(16)  |
| O4 <sup>6</sup> | Tb1  | O6 <sup>4</sup> | 79.3(3)    | O5               | K3   | P2 <sup>3</sup>  | 79.88(16)  |
| O4              | Tb1  | O6 <sup>4</sup> | 79.3(3)    | O5 <sup>8</sup>  | K3   | P2 <sup>8</sup>  | 24.81(19)  |
| O4              | Tb1  | O3 <sup>5</sup> | 80.4(3)    | O5 <sup>3</sup>  | K3   | O4 <sup>3</sup>  | 49.6(2)    |
| O4 <sup>6</sup> | Tb1  | O3 <sup>5</sup> | 80.4(3)    | O5               | K3   | O4 <sup>3</sup>  | 93.2(2)    |
| O4              | Tb1  | O2 <sup>5</sup> | 122.0(2)   | O5 <sup>3</sup>  | K3   | O4 <sup>10</sup> | 108.8(3)   |
| O4 <sup>6</sup> | Tb1  | O2 <sup>5</sup> | 122.0(2)   | O5 <sup>8</sup>  | K3   | O4 <sup>3</sup>  | 108.8(3)   |
| O1 <sup>6</sup> | Tb1  | K2 <sup>2</sup> | 108.15(19) | O5               | K3   | O4 <sup>10</sup> | 93.2(2)    |
| O1 <sup>6</sup> | Tb1  | K2 <sup>3</sup> | 119.31(19) | O5 <sup>8</sup>  | K3   | O4 <sup>10</sup> | 49.6(2)    |
| O1              | Tb1  | K2 <sup>1</sup> | 108.15(19) | O5               | K3   | O1 <sup>4</sup>  | 111.6(2)   |
| O1 <sup>6</sup> | Tb1  | K2 <sup>1</sup> | 48.25(19)  | O5               | K3   | O1 <sup>17</sup> | 111.6(2)   |
| O1              | Tb1  | K2 <sup>3</sup> | 119.31(19) | O5               | K3   | O5 <sup>8</sup>  | 75.1(2)    |
| O1              | Tb1  | K2 <sup>2</sup> | 48.25(19)  | O5               | K3   | O5 <sup>3</sup>  | 75.1(2)    |
| O1              | Tb1  | K3 <sup>4</sup> | 49.06(19)  | O5 <sup>3</sup>  | K3   | O5 <sup>8</sup>  | 141.4(4)   |
| O1 <sup>6</sup> | Tb1  | K3 <sup>4</sup> | 49.06(19)  | Tb1 <sup>5</sup> | P1   | K2 <sup>2</sup>  | 153.65(15) |
| O1 <sup>6</sup> | Tb1  | P1 <sup>5</sup> | 99.4(2)    | Tb1 <sup>5</sup> | P1   | K1 <sup>16</sup> | 77.69(9)   |
| O1              | Tb1  | P1 <sup>5</sup> | 99.4(2)    | Tb1 <sup>5</sup> | P1   | K1 <sup>5</sup>  | 77.69(9)   |
| O1              | Tb1  | O1 <sup>6</sup> | 81.2(4)    | Tb1 <sup>5</sup> | P1   | K1 <sup>1</sup>  | 121.60(15) |
| O1              | Tb1  | O6 <sup>4</sup> | 79.2(3)    | K2 <sup>2</sup>  | P1   | K1 <sup>16</sup> | 115.55(9)  |
| O1 <sup>6</sup> | Tb1  | O6 <sup>4</sup> | 79.2(3)    | K2 <sup>2</sup>  | P1   | K1 <sup>5</sup>  | 115.55(9)  |
| O1 <sup>6</sup> | Tb1  | O3 <sup>5</sup> | 120.7(2)   | K2 <sup>2</sup>  | P1   | K1 <sup>1</sup>  | 84.76(13)  |
| O1              | Tb1  | O3 <sup>5</sup> | 120.7(2)   | K1 <sup>1</sup>  | P1   | K1 <sup>16</sup> | 69.56(9)   |

| Atom             | Atom | Atom             | Angle/°    | Atom             | Atom | Atom             | Angle/°    |
|------------------|------|------------------|------------|------------------|------|------------------|------------|
| O1               | Tb1  | O2 <sup>5</sup>  | 77.0(3)    | K1 <sup>16</sup> | P1   | K1 <sup>5</sup>  | 108.86(14) |
| O1 <sup>6</sup>  | Tb1  | O2 <sup>5</sup>  | 77.0(3)    | K1 <sup>1</sup>  | P1   | K1 <sup>5</sup>  | 69.56(9)   |
| O6 <sup>4</sup>  | Tb1  | K2 <sup>2</sup>  | 48.96(5)   | O1               | P1   | Tb1 <sup>5</sup> | 125.1(3)   |
| O6 <sup>4</sup>  | Tb1  | K2 <sup>1</sup>  | 48.96(5)   | O1 <sup>19</sup> | P1   | Tb1 <sup>5</sup> | 125.1(3)   |
| O6 <sup>4</sup>  | Tb1  | K2 <sup>3</sup>  | 54.5(3)    | O1               | P1   | K2 <sup>2</sup>  | 58.1(3)    |
| O6 <sup>4</sup>  | Tb1  | K3 <sup>4</sup>  | 45.3(3)    | O1 <sup>19</sup> | P1   | K2 <sup>2</sup>  | 58.1(3)    |
| O6 <sup>4</sup>  | Tb1  | P1 <sup>5</sup>  | 178.1(3)   | O1 <sup>19</sup> | P1   | K1 <sup>5</sup>  | 143.5(4)   |
| O6 <sup>4</sup>  | Tb1  | O3 <sup>5</sup>  | 152.1(4)   | O1               | P1   | K1 <sup>5</sup>  | 58.2(3)    |
| O3 <sup>5</sup>  | Tb1  | K2 <sup>2</sup>  | 127.93(9)  | O1 <sup>19</sup> | P1   | K1 <sup>16</sup> | 58.2(3)    |
| O3 <sup>5</sup>  | Tb1  | K2 <sup>3</sup>  | 97.6(2)    | O1               | P1   | K1 <sup>16</sup> | 143.5(4)   |
| O3 <sup>5</sup>  | Tb1  | K2 <sup>1</sup>  | 127.93(9)  | O1 <sup>19</sup> | P1   | K1 <sup>1</sup>  | 73.9(3)    |
| O3 <sup>5</sup>  | Tb1  | K3 <sup>4</sup>  | 162.5(3)   | O1               | P1   | K1 <sup>1</sup>  | 73.9(3)    |
| O3 <sup>5</sup>  | Tb1  | P1 <sup>5</sup>  | 29.8(2)    | O1 <sup>19</sup> | P1   | O1               | 109.7(6)   |
| O2 <sup>5</sup>  | Tb1  | K2 <sup>1</sup>  | 121.42(13) | O1 <sup>19</sup> | P1   | O3               | 110.9(4)   |
| O2 <sup>5</sup>  | Tb1  | K2 <sup>2</sup>  | 121.42(13) | O1               | P1   | O3               | 110.9(4)   |
| O2 <sup>5</sup>  | Tb1  | K2 <sup>3</sup>  | 157.1(3)   | O1               | P1   | O2               | 110.2(4)   |
| O2 <sup>5</sup>  | Tb1  | K3 <sup>4</sup>  | 103.1(3)   | O1 <sup>19</sup> | P1   | O2               | 110.2(4)   |
| O2 <sup>5</sup>  | Tb1  | P1 <sup>5</sup>  | 29.6(3)    | O3               | P1   | Tb1 <sup>5</sup> | 54.6(4)    |
| O2 <sup>5</sup>  | Tb1  | O6 <sup>4</sup>  | 148.4(4)   | O3               | P1   | K2 <sup>2</sup>  | 151.8(5)   |
| O2 <sup>5</sup>  | Tb1  | O3 <sup>5</sup>  | 59.4(3)    | O3               | P1   | K1 <sup>5</sup>  | 55.62(11)  |
| P2 <sup>7</sup>  | K2   | P2 <sup>8</sup>  | 94.09(10)  | O3               | P1   | K1 <sup>16</sup> | 55.62(11)  |
| O4 <sup>9</sup>  | K2   | P2 <sup>7</sup>  | 28.50(14)  | O3               | P1   | K1 <sup>1</sup>  | 67.0(4)    |
| O4 <sup>3</sup>  | K2   | P2 <sup>8</sup>  | 94.27(18)  | O3               | P1   | O2               | 104.7(6)   |
| O4 <sup>7</sup>  | K2   | P2 <sup>7</sup>  | 28.50(14)  | O2               | P1   | Tb1 <sup>5</sup> | 50.2(4)    |
| O4 <sup>7</sup>  | K2   | P2 <sup>8</sup>  | 122.59(18) | O2               | P1   | K2 <sup>2</sup>  | 103.5(5)   |
| O4 <sup>10</sup> | K2   | P2 <sup>8</sup>  | 28.61(16)  | O2               | P1   | K1 <sup>1</sup>  | 171.8(5)   |
| O4 <sup>10</sup> | K2   | P2 <sup>7</sup>  | 83.45(19)  | O2               | P1   | K1 <sup>5</sup>  | 106.2(3)   |
| O4 <sup>3</sup>  | K2   | P2 <sup>7</sup>  | 83.45(19)  | O2               | P1   | K1 <sup>16</sup> | 106.2(3)   |
| O4 <sup>9</sup>  | K2   | P2 <sup>8</sup>  | 79.72(16)  | K2 <sup>1</sup>  | P2   | K2 <sup>8</sup>  | 85.91(10)  |
| O4 <sup>10</sup> | K2   | O4 <sup>3</sup>  | 66.7(3)    | K2 <sup>8</sup>  | P2   | K2 <sup>3</sup>  | 119.93(16) |
| O4 <sup>9</sup>  | K2   | O4 <sup>7</sup>  | 48.9(3)    | K2 <sup>1</sup>  | P2   | K2 <sup>3</sup>  | 85.91(10)  |
| O4 <sup>3</sup>  | K2   | O4 <sup>7</sup>  | 82.4(2)    | K2 <sup>1</sup>  | P2   | K3 <sup>8</sup>  | 124.32(8)  |
| O4 <sup>10</sup> | K2   | O4 <sup>9</sup>  | 82.4(2)    | K2 <sup>3</sup>  | P2   | K3 <sup>3</sup>  | 59.54(8)   |
| O4 <sup>3</sup>  | K2   | O4 <sup>9</sup>  | 108.88(18) | K2 <sup>8</sup>  | P2   | K3 <sup>3</sup>  | 148.04(14) |
| O4 <sup>10</sup> | K2   | O4 <sup>7</sup>  | 108.88(18) | K2 <sup>8</sup>  | P2   | K3 <sup>8</sup>  | 59.54(8)   |
| O4 <sup>10</sup> | K2   | O6 <sup>8</sup>  | 53.4(3)    | K2 <sup>1</sup>  | P2   | K3 <sup>3</sup>  | 124.32(8)  |
| O4 <sup>3</sup>  | K2   | O6 <sup>8</sup>  | 119.9(3)   | K2 <sup>3</sup>  | P2   | K3 <sup>8</sup>  | 148.04(14) |
| O4 <sup>10</sup> | K2   | O6 <sup>7</sup>  | 60.6(2)    | K1 <sup>20</sup> | P2   | K2 <sup>3</sup>  | 119.32(8)  |
| O4 <sup>9</sup>  | K2   | O6 <sup>7</sup>  | 48.4(2)    | K1 <sup>20</sup> | P2   | K2 <sup>1</sup>  | 110.11(15) |
| O4 <sup>3</sup>  | K2   | O6 <sup>3</sup>  | 53.4(3)    | K1 <sup>20</sup> | P2   | K2 <sup>8</sup>  | 119.32(8)  |
| O4 <sup>10</sup> | K2   | O6 <sup>3</sup>  | 119.9(3)   | K1 <sup>20</sup> | P2   | K3 <sup>8</sup>  | 63.82(9)   |
| O4 <sup>3</sup>  | K2   | O6 <sup>7</sup>  | 60.6(2)    | K1 <sup>20</sup> | P2   | K3 <sup>3</sup>  | 63.82(9)   |
| O4 <sup>7</sup>  | K2   | O6 <sup>7</sup>  | 48.4(2)    | K3 <sup>8</sup>  | P2   | K3 <sup>3</sup>  | 103.04(13) |
| O1 <sup>11</sup> | K2   | P2 <sup>7</sup>  | 93.8(2)    | P2 <sup>21</sup> | P2   | K2 <sup>8</sup>  | 0(10)      |
| O1 <sup>11</sup> | K2   | P2 <sup>8</sup>  | 92.71(16)  | P2 <sup>21</sup> | P2   | K2 <sup>3</sup>  | 0(10)      |
| O1 <sup>12</sup> | K2   | P2 <sup>8</sup>  | 145.66(18) | P2 <sup>21</sup> | P2   | K2 <sup>1</sup>  | 0(10)      |
| O1 <sup>12</sup> | K2   | P2 <sup>7</sup>  | 93.8(2)    | P2 <sup>21</sup> | P2   | K1 <sup>20</sup> | 0(10)      |
| O1 <sup>12</sup> | K2   | O4 <sup>10</sup> | 172.7(2)   | P2 <sup>21</sup> | P2   | K3 <sup>3</sup>  | 0(10)      |

| Atom             | Atom | Atom             | Angle/°    | Atom             | Atom | Atom             | Angle/°   |
|------------------|------|------------------|------------|------------------|------|------------------|-----------|
| O1 <sup>12</sup> | K2   | O4 <sup>7</sup>  | 70.2(2)    | P2 <sup>21</sup> | P2   | K3 <sup>8</sup>  | 0(10)     |
| O1 <sup>11</sup> | K2   | O4 <sup>7</sup>  | 91.9(2)    | P2 <sup>21</sup> | P2   | O4 <sup>21</sup> | 0(10)     |
| O1 <sup>12</sup> | K2   | O4 <sup>9</sup>  | 91.9(2)    | P2 <sup>21</sup> | P2   | O4               | 0(10)     |
| O1 <sup>11</sup> | K2   | O4 <sup>9</sup>  | 70.2(2)    | P2 <sup>21</sup> | P2   | O6               | 0(10)     |
| O1 <sup>12</sup> | K2   | O4 <sup>3</sup>  | 119.8(2)   | P2 <sup>21</sup> | P2   | O5               | 0(10)     |
| O1 <sup>11</sup> | K2   | O4 <sup>10</sup> | 119.8(2)   | O4 <sup>21</sup> | P2   | K2 <sup>1</sup>  | 69.2(3)   |
| O1 <sup>11</sup> | K2   | O4 <sup>3</sup>  | 172.7(2)   | O4               | P2   | K2 <sup>3</sup>  | 60.1(3)   |
| O1 <sup>12</sup> | K2   | O1 <sup>11</sup> | 53.4(3)    | O4               | P2   | K2 <sup>8</sup>  | 155.1(4)  |
| O1 <sup>12</sup> | K2   | O6 <sup>3</sup>  | 66.5(3)    | O4               | P2   | K2 <sup>1</sup>  | 69.2(3)   |
| O1 <sup>12</sup> | K2   | O6 <sup>7</sup>  | 118.6(3)   | O4 <sup>21</sup> | P2   | K2 <sup>8</sup>  | 60.1(3)   |
| O1 <sup>12</sup> | K2   | O6 <sup>8</sup>  | 119.7(3)   | O4 <sup>21</sup> | P2   | K2 <sup>3</sup>  | 155.1(4)  |
| O1 <sup>11</sup> | K2   | O6 <sup>3</sup>  | 119.7(3)   | O4 <sup>21</sup> | P2   | K1 <sup>20</sup> | 71.7(3)   |
| O1 <sup>11</sup> | K2   | O6 <sup>8</sup>  | 66.5(3)    | O4               | P2   | K1 <sup>20</sup> | 71.7(3)   |
| O1 <sup>11</sup> | K2   | O6 <sup>7</sup>  | 118.6(3)   | O4               | P2   | K3 <sup>3</sup>  | 56.1(3)   |
| O6 <sup>8</sup>  | K2   | P2 <sup>7</sup>  | 85.2(2)    | O4 <sup>21</sup> | P2   | K3 <sup>3</sup>  | 135.5(4)  |
| O6 <sup>3</sup>  | K2   | P2 <sup>7</sup>  | 85.2(2)    | O4               | P2   | K3 <sup>8</sup>  | 135.5(4)  |
| O6 <sup>7</sup>  | K2   | P2 <sup>7</sup>  | 28.1(2)    | O4 <sup>21</sup> | P2   | K3 <sup>8</sup>  | 56.1(3)   |
| O6 <sup>3</sup>  | K2   | P2 <sup>8</sup>  | 147.6(3)   | O4               | P2   | O4 <sup>21</sup> | 108.5(6)  |
| O6 <sup>7</sup>  | K2   | P2 <sup>8</sup>  | 80.19(13)  | O6               | P2   | K2 <sup>8</sup>  | 60.42(9)  |
| O6 <sup>8</sup>  | K2   | P2 <sup>8</sup>  | 28.4(2)    | O6               | P2   | K2 <sup>3</sup>  | 60.42(9)  |
| O6 <sup>8</sup>  | K2   | O4 <sup>7</sup>  | 110.5(3)   | O6               | P2   | K2 <sup>1</sup>  | 72.3(5)   |
| O6 <sup>3</sup>  | K2   | O4 <sup>7</sup>  | 61.6(3)    | O6               | P2   | K1 <sup>20</sup> | 177.5(5)  |
| O6 <sup>3</sup>  | K2   | O4 <sup>9</sup>  | 110.5(3)   | O6               | P2   | K3 <sup>3</sup>  | 115.0(2)  |
| O6 <sup>8</sup>  | K2   | O4 <sup>9</sup>  | 61.6(3)    | O6               | P2   | K3 <sup>8</sup>  | 115.0(2)  |
| O6 <sup>8</sup>  | K2   | O6 <sup>7</sup>  | 84.4(2)    | O6               | P2   | O4               | 109.5(4)  |
| O6 <sup>3</sup>  | K2   | O6 <sup>7</sup>  | 84.4(2)    | O6               | P2   | O4 <sup>21</sup> | 109.5(4)  |
| O6 <sup>8</sup>  | K2   | O6 <sup>3</sup>  | 168.9(5)   | O5               | P2   | K2 <sup>3</sup>  | 95.8(2)   |
| O5               | K2   | P2 <sup>7</sup>  | 174.5(3)   | O5               | P2   | K2 <sup>1</sup>  | 176.5(5)  |
| O5               | K2   | P2 <sup>8</sup>  | 88.64(16)  | O5               | P2   | K2 <sup>8</sup>  | 95.8(2)   |
| O5               | K2   | O4 <sup>9</sup>  | 148.5(2)   | O5               | P2   | K1 <sup>20</sup> | 66.4(5)   |
| O5               | K2   | O4 <sup>3</sup>  | 101.1(3)   | O5               | P2   | K3 <sup>3</sup>  | 54.63(14) |
| O5               | K2   | O4 <sup>7</sup>  | 148.5(2)   | O5               | P2   | K3 <sup>8</sup>  | 54.63(14) |
| O5               | K2   | O4 <sup>10</sup> | 101.1(3)   | O5               | P2   | O4               | 109.0(4)  |
| O5               | K2   | O1 <sup>11</sup> | 81.3(3)    | O5               | P2   | O4 <sup>21</sup> | 109.0(4)  |
| O5               | K2   | O1 <sup>12</sup> | 81.3(3)    | O5               | P2   | O6               | 111.2(6)  |
| O5               | K2   | O6 <sup>7</sup>  | 157.4(4)   | Tb1              | O4   | K2 <sup>3</sup>  | 97.1(3)   |
| O5               | K2   | O6 <sup>8</sup>  | 95.1(2)    | Tb1              | O4   | K2 <sup>1</sup>  | 88.2(2)   |
| O5               | K2   | O6 <sup>3</sup>  | 95.1(2)    | Tb1              | O4   | K1 <sup>20</sup> | 98.5(3)   |
| P2 <sup>13</sup> | K1   | O1 <sup>7</sup>  | 96.02(17)  | Tb1              | O4   | K3 <sup>3</sup>  | 92.2(2)   |
| P2 <sup>13</sup> | K1   | O1 <sup>14</sup> | 96.02(17)  | K2 <sup>3</sup>  | O4   | K2 <sup>1</sup>  | 97.6(2)   |
| O4 <sup>6</sup>  | K1   | P2 <sup>13</sup> | 28.32(14)  | K2 <sup>3</sup>  | O4   | K1 <sup>20</sup> | 140.9(3)  |
| O4 <sup>13</sup> | K1   | P2 <sup>13</sup> | 28.32(14)  | K2 <sup>1</sup>  | O4   | K1 <sup>20</sup> | 118.5(3)  |
| O4 <sup>6</sup>  | K1   | O4 <sup>13</sup> | 47.8(3)    | K2 <sup>3</sup>  | O4   | K3 <sup>3</sup>  | 71.4(2)   |
| O4 <sup>6</sup>  | K1   | O1 <sup>14</sup> | 118.3(2)   | K3 <sup>3</sup>  | O4   | K2 <sup>1</sup>  | 169.0(3)  |
| O4 <sup>13</sup> | K1   | O1 <sup>14</sup> | 99.3(2)    | K3 <sup>3</sup>  | O4   | K1 <sup>20</sup> | 72.34(19) |
| O4 <sup>13</sup> | K1   | O1 <sup>7</sup>  | 118.3(2)   | P2 <sup>21</sup> | O4   | Tb1              | 168.1(5)  |
| O4 <sup>6</sup>  | K1   | O1 <sup>7</sup>  | 99.3(2)    | P2               | O4   | Tb1              | 168.1(5)  |
| O1 <sup>15</sup> | K1   | P2 <sup>13</sup> | 130.86(18) | P2               | O4   | K2 <sup>1</sup>  | 82.3(3)   |

| Atom             | Atom | Atom             | Angle/°    | Atom             | Atom | Atom             | Angle/°   |
|------------------|------|------------------|------------|------------------|------|------------------|-----------|
| O1 <sup>5</sup>  | K1   | P2 <sup>13</sup> | 130.86(18) | P2 <sup>21</sup> | O4   | K2 <sup>3</sup>  | 91.2(4)   |
| O1 <sup>15</sup> | K1   | O4 <sup>6</sup>  | 131.0(2)   | P2               | O4   | K2 <sup>3</sup>  | 91.2(4)   |
| O1 <sup>5</sup>  | K1   | O4 <sup>13</sup> | 131.0(2)   | P2 <sup>21</sup> | O4   | K2 <sup>1</sup>  | 82.3(3)   |
| O1 <sup>5</sup>  | K1   | O4 <sup>6</sup>  | 103.2(2)   | P2               | O4   | K1 <sup>20</sup> | 80.0(3)   |
| O1 <sup>15</sup> | K1   | O4 <sup>13</sup> | 103.2(2)   | P2 <sup>21</sup> | O4   | K1 <sup>20</sup> | 80.0(3)   |
| O1 <sup>15</sup> | K1   | O1 <sup>7</sup>  | 129.21(16) | P2               | O4   | K3 <sup>3</sup>  | 98.5(4)   |
| O1 <sup>5</sup>  | K1   | O1 <sup>14</sup> | 129.21(16) | P2 <sup>21</sup> | O4   | K3 <sup>3</sup>  | 98.5(4)   |
| O1 <sup>15</sup> | K1   | O1 <sup>14</sup> | 103.01(19) | P2 <sup>21</sup> | O4   | P2               | 0.0(3)    |
| O1 <sup>15</sup> | K1   | O1 <sup>5</sup>  | 63.6(3)    | Tb1              | O1   | K2 <sup>2</sup>  | 92.2(2)   |
| O1 <sup>7</sup>  | K1   | O1 <sup>14</sup> | 45.5(3)    | Tb1              | O1   | K1 <sup>1</sup>  | 161.8(3)  |
| O1 <sup>5</sup>  | K1   | O1 <sup>7</sup>  | 103.01(19) | Tb1              | O1   | K1 <sup>5</sup>  | 92.8(2)   |
| O1 <sup>15</sup> | K1   | O3 <sup>7</sup>  | 82.0(2)    | Tb1              | O1   | K3 <sup>4</sup>  | 92.3(2)   |
| O1 <sup>5</sup>  | K1   | O3 <sup>7</sup>  | 82.0(2)    | K2 <sup>2</sup>  | O1   | K1 <sup>1</sup>  | 94.5(2)   |
| O1 <sup>15</sup> | K1   | O5 <sup>13</sup> | 146.43(16) | K2 <sup>2</sup>  | O1   | K1 <sup>5</sup>  | 165.7(3)  |
| O1 <sup>5</sup>  | K1   | O5 <sup>13</sup> | 146.43(16) | K2 <sup>2</sup>  | O1   | K3 <sup>4</sup>  | 82.1(2)   |
| O3 <sup>7</sup>  | K1   | P2 <sup>13</sup> | 139.1(2)   | K1 <sup>5</sup>  | O1   | K1 <sup>1</sup>  | 76.99(19) |
| O3 <sup>5</sup>  | K1   | P2 <sup>13</sup> | 89.0(2)    | K3 <sup>4</sup>  | O1   | K1 <sup>1</sup>  | 71.92(19) |
| O3 <sup>16</sup> | K1   | P2 <sup>13</sup> | 89.0(2)    | K3 <sup>4</sup>  | O1   | K1 <sup>5</sup>  | 84.4(2)   |
| O3 <sup>7</sup>  | K1   | O4 <sup>13</sup> | 145.8(2)   | P1               | O1   | Tb1              | 117.4(4)  |
| O3 <sup>5</sup>  | K1   | O4 <sup>6</sup>  | 62.4(3)    | P1               | O1   | K2 <sup>2</sup>  | 94.0(4)   |
| O3 <sup>5</sup>  | K1   | O4 <sup>13</sup> | 109.1(3)   | P1               | O1   | K1 <sup>1</sup>  | 79.1(3)   |
| O3 <sup>7</sup>  | K1   | O4 <sup>6</sup>  | 145.8(2)   | P1               | O1   | K1 <sup>5</sup>  | 95.5(4)   |
| O3 <sup>16</sup> | K1   | O4 <sup>13</sup> | 62.4(3)    | P1               | O1   | K3 <sup>4</sup>  | 150.2(5)  |
| O3 <sup>16</sup> | K1   | O4 <sup>6</sup>  | 109.1(3)   | Tb1 <sup>4</sup> | O6   | K2 <sup>8</sup>  | 90.3(2)   |
| O3 <sup>16</sup> | K1   | O1 <sup>7</sup>  | 125.4(3)   | Tb1 <sup>4</sup> | O6   | K2 <sup>3</sup>  | 90.3(2)   |
| O3 <sup>5</sup>  | K1   | O1 <sup>15</sup> | 114.0(3)   | Tb1 <sup>4</sup> | O6   | K2 <sup>1</sup>  | 86.0(3)   |
| O3 <sup>16</sup> | K1   | O1 <sup>5</sup>  | 114.0(3)   | Tb1 <sup>4</sup> | O6   | K3               | 95.0(4)   |
| O3 <sup>7</sup>  | K1   | O1 <sup>14</sup> | 47.2(2)    | K2 <sup>8</sup>  | O6   | K2 <sup>1</sup>  | 95.6(2)   |
| O3 <sup>5</sup>  | K1   | O1 <sup>14</sup> | 125.4(3)   | K2 <sup>8</sup>  | O6   | K2 <sup>3</sup>  | 168.9(5)  |
| O3 <sup>5</sup>  | K1   | O1 <sup>5</sup>  | 51.6(3)    | K2 <sup>3</sup>  | O6   | K2 <sup>1</sup>  | 95.6(2)   |
| O3 <sup>7</sup>  | K1   | O1 <sup>7</sup>  | 47.2(2)    | K3               | O6   | K2 <sup>1</sup>  | 179.0(4)  |
| O3 <sup>16</sup> | K1   | O1 <sup>15</sup> | 51.6(3)    | K3               | O6   | K2 <sup>8</sup>  | 84.5(2)   |
| O3 <sup>16</sup> | K1   | O1 <sup>14</sup> | 79.9(2)    | K3               | O6   | K2 <sup>3</sup>  | 84.5(2)   |
| O3 <sup>5</sup>  | K1   | O1 <sup>7</sup>  | 79.9(2)    | P2               | O6   | Tb1 <sup>4</sup> | 165.5(7)  |
| O3 <sup>16</sup> | K1   | O3 <sup>7</sup>  | 99.0(2)    | P2 <sup>21</sup> | O6   | Tb1 <sup>4</sup> | 165.5(7)  |
| O3 <sup>16</sup> | K1   | O3 <sup>5</sup>  | 154.7(4)   | P2 <sup>21</sup> | O6   | K2 <sup>8</sup>  | 91.1(2)   |
| O3 <sup>5</sup>  | K1   | O3 <sup>7</sup>  | 99.0(2)    | P2               | O6   | K2 <sup>1</sup>  | 79.6(4)   |
| O3 <sup>5</sup>  | K1   | O5 <sup>13</sup> | 95.1(2)    | P2               | O6   | K2 <sup>3</sup>  | 91.1(2)   |
| O3 <sup>16</sup> | K1   | O5 <sup>13</sup> | 95.1(2)    | P2 <sup>21</sup> | O6   | K2 <sup>3</sup>  | 91.1(2)   |
| O2               | K1   | P2 <sup>13</sup> | 80.9(3)    | P2               | O6   | K2 <sup>8</sup>  | 91.1(2)   |
| O2               | K1   | O4 <sup>6</sup>  | 67.5(3)    | P2 <sup>21</sup> | O6   | K2 <sup>1</sup>  | 79.6(4)   |
| O2               | K1   | O4 <sup>13</sup> | 67.5(3)    | P2 <sup>21</sup> | O6   | K3               | 99.5(6)   |
| O2               | K1   | O1 <sup>7</sup>  | 157.14(14) | P2               | O6   | K3               | 99.5(6)   |
| O2               | K1   | O1 <sup>5</sup>  | 64.4(3)    | P2 <sup>21</sup> | O6   | P2               | 0.0(3)    |
| O2               | K1   | O1 <sup>15</sup> | 64.4(3)    | Tb1 <sup>5</sup> | O3   | K1 <sup>16</sup> | 98.8(2)   |
| O2               | K1   | O1 <sup>14</sup> | 157.14(14) | Tb1 <sup>5</sup> | O3   | K1 <sup>1</sup>  | 179.0(4)  |
| O2               | K1   | O3 <sup>16</sup> | 77.4(2)    | Tb1 <sup>5</sup> | O3   | K1 <sup>5</sup>  | 98.8(2)   |
| O2               | K1   | O3 <sup>7</sup>  | 140.0(3)   | Tb1 <sup>5</sup> | O3   | K3 <sup>22</sup> | 94.0(4)   |

| Atom             | Atom | Atom             | Angle/°    | Atom             | Atom | Atom             | Angle/°  |
|------------------|------|------------------|------------|------------------|------|------------------|----------|
| O2               | K1   | O3 <sup>5</sup>  | 77.4(2)    | K1 <sup>5</sup>  | O3   | K1 <sup>1</sup>  | 81.0(2)  |
| O2               | K1   | O5 <sup>13</sup> | 109.2(3)   | K1 <sup>16</sup> | O3   | K1 <sup>1</sup>  | 81.0(2)  |
| O5 <sup>13</sup> | K1   | P2 <sup>13</sup> | 28.2(2)    | K1 <sup>16</sup> | O3   | K1 <sup>5</sup>  | 154.7(4) |
| O5 <sup>13</sup> | K1   | O4 <sup>13</sup> | 48.8(2)    | K3 <sup>22</sup> | O3   | K1 <sup>1</sup>  | 85.0(3)  |
| O5 <sup>13</sup> | K1   | O4 <sup>6</sup>  | 48.8(2)    | K3 <sup>22</sup> | O3   | K1 <sup>16</sup> | 80.4(2)  |
| O5 <sup>13</sup> | K1   | O1 <sup>14</sup> | 70.1(2)    | K3 <sup>22</sup> | O3   | K1 <sup>5</sup>  | 80.4(2)  |
| O5 <sup>13</sup> | K1   | O1 <sup>7</sup>  | 70.1(2)    | P1               | O3   | Tb1 <sup>5</sup> | 95.6(5)  |
| O5 <sup>13</sup> | K1   | O3 <sup>7</sup>  | 110.9(3)   | P1               | O3   | K1 <sup>16</sup> | 98.1(2)  |
| K2               | K3   | P2 <sup>3</sup>  | 55.21(8)   | P1               | O3   | K1 <sup>1</sup>  | 85.4(5)  |
| K2               | K3   | P2 <sup>8</sup>  | 55.21(8)   | P1               | O3   | K1 <sup>5</sup>  | 98.1(2)  |
| P2 <sup>8</sup>  | K3   | P2 <sup>3</sup>  | 103.04(13) | P1               | O3   | K3 <sup>22</sup> | 170.4(7) |
| O4 <sup>10</sup> | K3   | K2               | 51.58(17)  | Tb1 <sup>5</sup> | O2   | K1               | 100.5(4) |
| O4 <sup>3</sup>  | K3   | K2               | 51.58(17)  | P1               | O2   | Tb1 <sup>5</sup> | 100.2(5) |
| O4 <sup>3</sup>  | K3   | P2 <sup>8</sup>  | 84.31(17)  | P1               | O2   | K1               | 159.3(7) |
| O4 <sup>10</sup> | K3   | P2 <sup>3</sup>  | 84.31(17)  | K2               | O5   | K1 <sup>20</sup> | 103.6(4) |
| O4 <sup>10</sup> | K3   | P2 <sup>8</sup>  | 25.36(15)  | K2               | O5   | K3               | 75.9(3)  |
| O4 <sup>3</sup>  | K3   | P2 <sup>3</sup>  | 25.36(15)  | K2               | O5   | K3 <sup>8</sup>  | 82.1(2)  |
| O4 <sup>10</sup> | K3   | O4 <sup>3</sup>  | 61.8(3)    | K2               | O5   | K3 <sup>3</sup>  | 82.1(2)  |
| O1 <sup>4</sup>  | K3   | K2               | 144.87(17) | K1 <sup>20</sup> | O5   | K3 <sup>8</sup>  | 74.9(2)  |
| O1 <sup>17</sup> | K3   | K2               | 144.87(16) | K1 <sup>20</sup> | O5   | K3 <sup>3</sup>  | 74.9(2)  |
| O1 <sup>4</sup>  | K3   | P2 <sup>3</sup>  | 159.81(18) | K3               | O5   | K1 <sup>20</sup> | 179.5(4) |
| O1 <sup>17</sup> | K3   | P2 <sup>8</sup>  | 159.81(18) | K3 <sup>3</sup>  | O5   | K3 <sup>8</sup>  | 141.4(4) |
| O1 <sup>4</sup>  | K3   | P2 <sup>8</sup>  | 95.49(16)  | K3               | O5   | K3 <sup>8</sup>  | 104.9(2) |
| O1 <sup>17</sup> | K3   | P2 <sup>3</sup>  | 95.49(16)  | K3               | O5   | K3 <sup>3</sup>  | 104.9(2) |
| O1 <sup>4</sup>  | K3   | O4 <sup>3</sup>  | 154.8(2)   | P2               | O5   | K2               | 171.0(7) |
| O1 <sup>4</sup>  | K3   | O4 <sup>10</sup> | 110.6(2)   | P2 <sup>21</sup> | O5   | K2               | 171.0(7) |
| O1 <sup>17</sup> | K3   | O4 <sup>3</sup>  | 110.6(2)   | P2               | O5   | K1 <sup>20</sup> | 85.4(5)  |
| O1 <sup>17</sup> | K3   | O4 <sup>10</sup> | 154.8(2)   | P2 <sup>21</sup> | O5   | K1 <sup>20</sup> | 85.4(5)  |
| O1 <sup>17</sup> | K3   | O1 <sup>4</sup>  | 65.1(3)    | P2               | O5   | K3 <sup>3</sup>  | 100.6(2) |
| O1 <sup>4</sup>  | K3   | O5 <sup>8</sup>  | 75.2(2)    | P2 <sup>21</sup> | O5   | K3               | 95.1(5)  |
| O1 <sup>17</sup> | K3   | O5 <sup>8</sup>  | 139.5(3)   | P2               | O5   | K3               | 95.1(5)  |
| O1 <sup>17</sup> | K3   | O5 <sup>3</sup>  | 75.2(2)    | P2 <sup>21</sup> | O5   | K3 <sup>3</sup>  | 100.6(2) |
| O1 <sup>4</sup>  | K3   | O5 <sup>3</sup>  | 139.5(3)   | P2 <sup>21</sup> | O5   | K3 <sup>8</sup>  | 100.6(2) |
| O6               | K3   | K2               | 104.3(3)   | P2               | O5   | K3 <sup>8</sup>  | 100.6(2) |
| O6               | K3   | P2 <sup>8</sup>  | 112.43(15) | P2 <sup>21</sup> | O5   | P2               | 0.0(3)   |
| O6               | K3   | P2 <sup>3</sup>  | 112.43(15) |                  |      |                  |          |

**Table S6.** Parameters of oxygen polyhedra in  $K_3Tb(PO_4)_2$ .

| <b>Moieties (MO<sub>x</sub>)</b> | <b>TbO<sub>7</sub></b> | <b>K<sup>(2)</sup>O<sub>10</sub></b> | <b>K<sup>(1)</sup>O<sub>9</sub></b> | <b>K<sup>(3)</sup>O<sub>9</sub></b> | <b>P<sup>(1)</sup>O<sub>4</sub></b> | <b>P<sup>(2)</sup>O<sub>4</sub></b> |
|----------------------------------|------------------------|--------------------------------------|-------------------------------------|-------------------------------------|-------------------------------------|-------------------------------------|
| distances d <sub>M-O</sub> , Å   | 2.2644 x2              | 2.6840                               | 2.6260                              | 2.7112                              | 1.5302                              | 1.5256                              |
|                                  | 2.3767 x2              | 2.7838 x2                            | 2.8688 x2                           | 2.7147                              | 1.5302                              | 1.5399                              |
|                                  | 2.4024                 | 2.8050 x2                            | 2.9376 x2                           | 2.8312                              | 1.5367                              | 1.5486                              |
|                                  | 2.4356                 | 2.8119 x2                            | 2.9552                              | 2.8742 x2                           | 1.5471                              | 1.5486                              |
|                                  | 2.5213                 | 3.0339 x2                            | 3.0564                              | 2.9659 x2                           |                                     |                                     |
|                                  |                        | 3.1167                               | 3.0992 x2                           | 3.0017 x2                           |                                     |                                     |
| M site symmetry                  | <i>C<sub>s</sub></i>   |                                      |                                     |                                     |                                     |                                     |
| Polyhedron type                  | Caped trigonal prism   | Sphenocorona J87                     | Muffin                              |                                     | Tetrahedron                         |                                     |
| Symmetry of ideal polyhedron     | <i>C<sub>2v</sub></i>  |                                      | <i>C<sub>s</sub></i>                |                                     | <i>T<sub>d</sub></i>                |                                     |
| S                                | 0.690                  | 7.987                                | 8.048                               | 5.372                               | 0.056                               | 0.007                               |

**Table S7.** The positions ( $\lambda$ , nm) of the lines caused by electronic absorption transitions (numbered as #1, 2, 3, ...) from ground  $^7F_6$  level on excited levels of the  $Tb^{3+}$  ions and energy of these transitions ( $\nu$  in  $cm^{-1}$ ,  $h\nu$  in eV) found from diffuse reflectance ( $\lambda_{DR}$ ) and the PL excitation spectra ( $\lambda_{ex}$ ) of the  $K_3Tb(PO_4)_2$  crystals; *sh* – shoulder, *l* – low intensity

| $\lambda_{DR}$ | $\lambda_{ex}$    | $\nu_{ex}$ | $h\nu_{ex}$ , eV | Excited levels** | Transitions types                              | Transition, # in Fig. 10 |
|----------------|-------------------|------------|------------------|------------------|------------------------------------------------|--------------------------|
|                | 114               | 87758      | 10.88            | $3t_2$           | $2t_2 \rightarrow 3t_2$                        | 1                        |
|                | 127               | 79531      | 9.86             |                  |                                                | 2                        |
|                | 162               | 61624      | 7.64             | 2a               | $2t_2 \rightarrow 2a$                          | 3                        |
|                | 171               | 58479      | 7.25             |                  |                                                | 4                        |
|                | 186.1             | 53735      | 6.66             | $4f^8 5d^1$      | spin-allowed<br>$4f^8 \rightarrow 4f^8 5d^1$   | 5                        |
|                | 195.6             | 51125      | 6.34             |                  |                                                | 6                        |
|                | 210 ( <i>sh</i> ) | 47619      | 5.90             |                  |                                                | 7                        |
|                | 215.5             | 46403      | 5.72             |                  |                                                |                          |
|                | 223 ( <i>sh</i> ) | 44843      | 5.56             |                  |                                                |                          |
|                | 225 ( <i>sh</i> ) | 44444      | 5.51             |                  |                                                | 8                        |
| 258.5          | 253               | 39526      | 4.90             | $4f^8 5d^1$      | spin-forbidden<br>$4f^8 \rightarrow 4f^8 5d^1$ | 9                        |
| 269.1          | 264               | 37879      | 4.70             |                  |                                                | 10                       |
|                | 281               | 35587      | 4.41             | $^5F_4$          | intrinsic<br>$4f^8 \rightarrow 4f^8$           | 11                       |
|                | 284 ( <i>sh</i> ) | 35211      | 4.37             |                  |                                                |                          |
|                | 292 ( <i>l</i> )  | 34247      | 4.25             | $^5H_4$          |                                                | 12                       |
|                | 300               | 33333      | 4.13             |                  |                                                |                          |
|                | 305 ( <i>sh</i> ) | 32787      | 4.06             | $^5H_7$          |                                                | 13                       |
|                | 314               | 31847      | 3.95             |                  |                                                |                          |
|                | 318 ( <i>sh</i> ) | 31447      | 3.90             |                  |                                                |                          |
|                | 325 ( <i>l</i> )  | 30769      | 3.81             |                  |                                                |                          |
|                | 332 ( <i>sh</i> ) | 30120      | 3.73             | $^5G_2$          |                                                | 14                       |
|                | 336               | 29762      | 3.69             |                  |                                                |                          |
|                | 339 ( <i>sh</i> ) | 29499      | 3.66             |                  |                                                |                          |
|                | 344 ( <i>sh</i> ) | 29070      | 3.60             | $^5L_9$          |                                                | 15                       |
|                | 349 ( <i>sh</i> ) | 28653      | 3.55             |                  |                                                |                          |
| 351            | 350               | 28571      | 3.54             |                  |                                                |                          |
| 356            | 355               | 28169      | 3.49             | $^5D_2$          |                                                | 16                       |
| 363            | 361 ( <i>sh</i> ) | 27701      | 3.43             |                  |                                                |                          |
| 367            | 366               | 27322      | 3.39             | $^5D_3$          |                                                | 17                       |
| 371            | 369               | 27100      | 3.36             |                  |                                                |                          |
| 374            | 373               | 26810      | 3.32             |                  |                                                |                          |
| 378            | 376               | 26596      | 3.30             |                  |                                                |                          |
|                | 398 ( <i>l</i> )  | 25126      | 3.12             |                  |                                                |                          |
|                | 479 ( <i>sh</i> ) | 20877      | 2.59             | $^5D_4$          | 18                                             |                          |
| 483            | 482               | 20747      | 2.57             |                  |                                                |                          |
| 488            | 486               | 20576      | 2.55             |                  |                                                |                          |
| 495            | 494               | 20243      | 2.51             |                  |                                                |                          |

\*\* [1, 2]

#### References

- 1 W. T. Carnall, P. R. Fields, and K. Rajnak, *The Journal of Chemical Physics*, 1968, **49**, 4412-4423.
- 2 S. Kaur, A. S. Rao, M. Jayasimhadri, V. V. Jaiswal, and D. Haranath, *Journal of Alloys and Compounds*, 2020, **826**, 154212.
